# Supplementary material for: Fabrication of a β-CD-functionalized magnetic microporous organic network for effective enrichment and detection of fluoroquinolone antibiotics in water samples
Source: Royal Society of Chemistry journal article supplement (doi:10.1039/d4ay00245h), 2024-01-01
Supplement: d4ay00245h1.pdf [file d4ay00245h1.pdf]

Supplementary Information

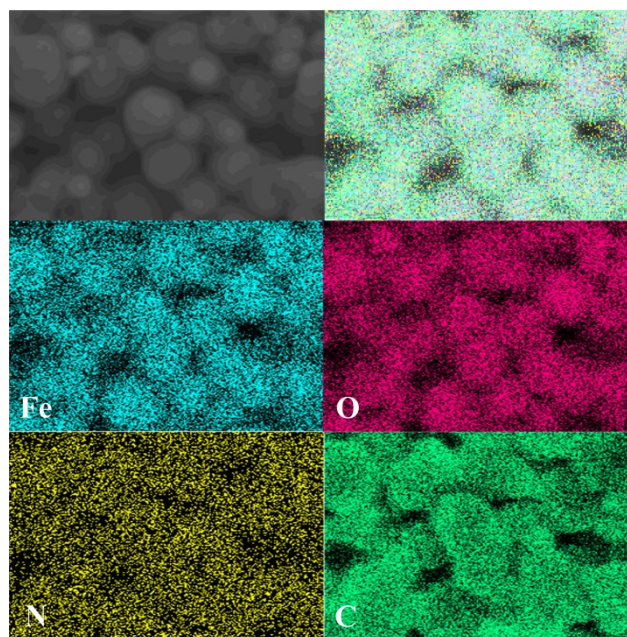

**Fig. S1** EDS elemental mapping of  $\text{Fe}_3\text{O}_4@MON\text{-NH}_2@CM\text{-}\beta\text{-CD}$ .

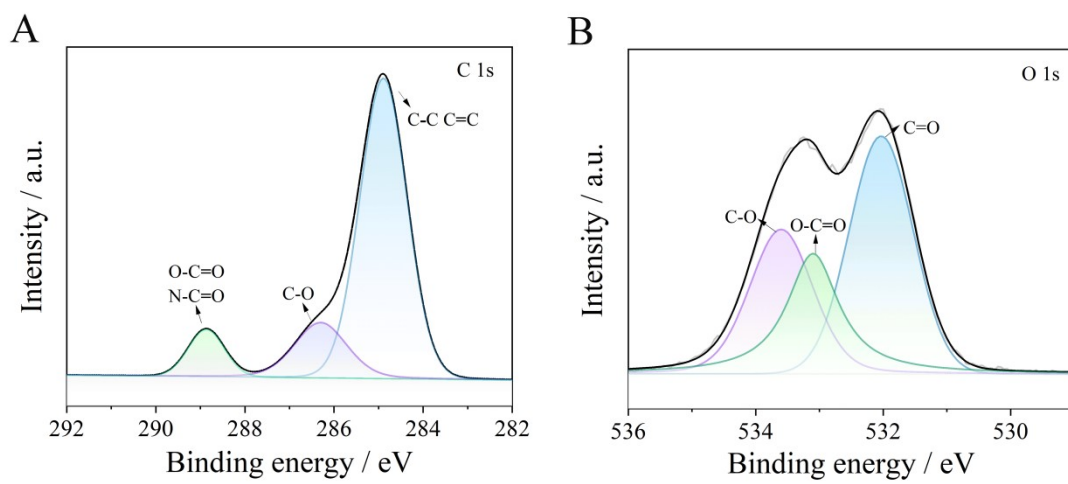

**Fig. S2** XPS spectra of Fe<sub>3</sub>O<sub>4</sub>@MON-NH<sub>2</sub>@CM-β-CD: (A) C 1s and (B) O 1s.

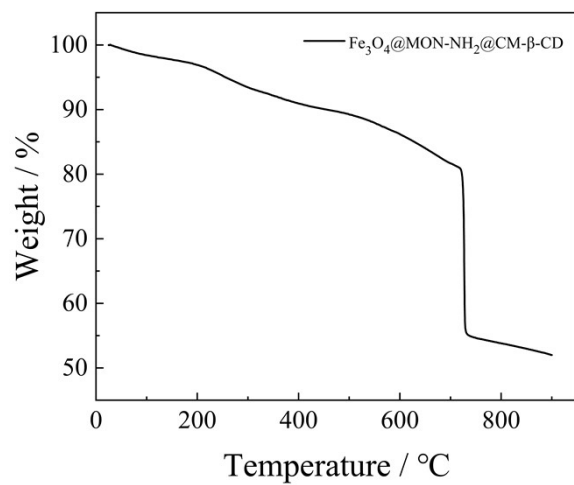

**Fig. S3** TG curves of Fe<sub>3</sub>O<sub>4</sub>@MON-NH<sub>2</sub>@CM-β-CD.

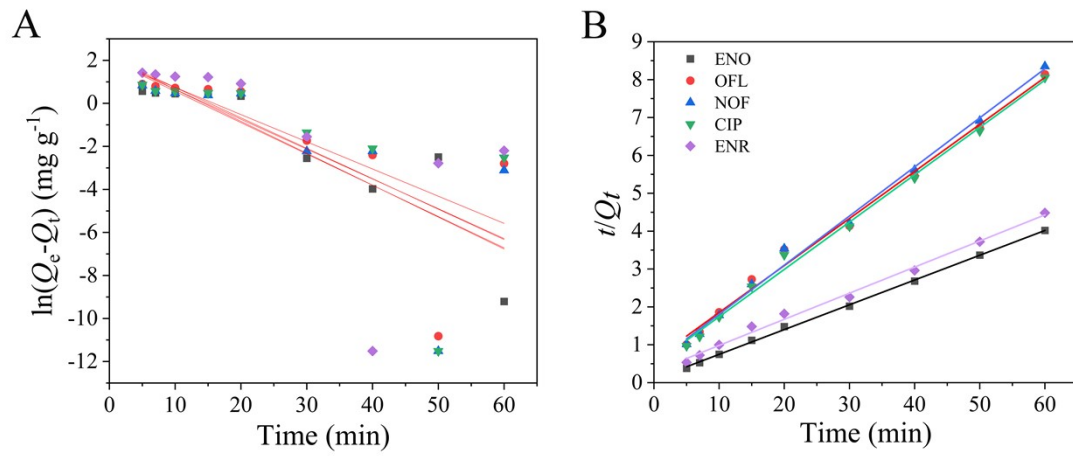

**Fig. S4** The fitting curves of two models: quasi-first-order dynamics model (A); quasi-second-order kinetic model (B).

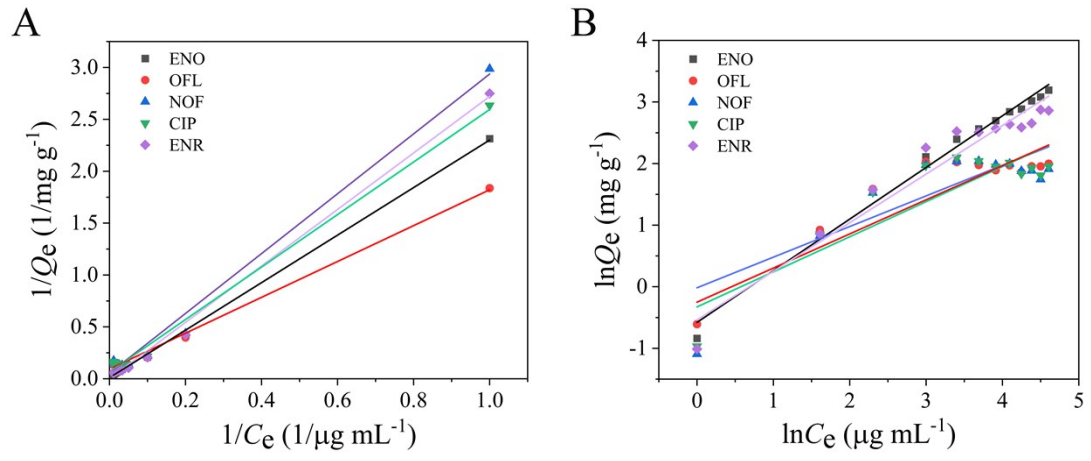

**Fig. S5** The adsorption isotherm fitting curves: Langmuir model (A); Freundlich model (B).

**Table S1** The fitted kinetic parameters of the pseudo-first-order and pseudo-second-order kinetic model.

| FQs | Pseudo-first-order kinetic model |                                |                               |                | Pseudo-second-order kinetic model |                                                  |                |
|-----|----------------------------------|--------------------------------|-------------------------------|----------------|-----------------------------------|--------------------------------------------------|----------------|
|     | $Q_e$<br>(mg g <sup>-1</sup> )   | $Q_e$<br>(mg g <sup>-1</sup> ) | $K_1$<br>(min <sup>-1</sup> ) | R <sup>2</sup> | $Q_e$<br>(mg g <sup>-1</sup> )    | $K_2$<br>(g mg <sup>-1</sup> min <sup>-1</sup> ) | R <sup>2</sup> |
| ENO | 14.84                            | 8.43                           | 0.148                         | 0.8073         | 15.28                             | 0.045                                            | 0.9991         |
| OFL | 7.30                             | 8.62                           | 0.141                         | 0.5532         | 8.05                              | 0.025                                            | 0.9922         |
| NOF | 7.20                             | 7.53                           | 0.145                         | 0.5396         | 7.71                              | 0.032                                            | 0.9943         |
| CIP | 7.42                             | 7.67                           | 0.138                         | 0.4922         | 8.00                              | 0.031                                            | 0.9948         |
| ENR | 13.47                            | 7.45                           | 0.126                         | 0.3619         | 14.50                             | 0.016                                            | 0.9946         |

**Table S2** The fitted parameters of the Langmuir and Freundlich model.

| FQs | Langmuir model                 |                                |                | Freundlich model |                                |                |
|-----|--------------------------------|--------------------------------|----------------|------------------|--------------------------------|----------------|
|     | $Q_m$<br>(mg g <sup>-1</sup> ) | $K_L$<br>(L mg <sup>-1</sup> ) | R <sup>2</sup> | 1/ <i>n</i>      | $K_F$<br>(mg g <sup>-1</sup> ) | R <sup>2</sup> |
| ENO | 94.51                          | 0.0046                         | 0.9990         | 0.8387           | 0.5606                         | 0.9862         |
| OFL | 10.65                          | 0.0543                         | 0.9999         | 0.4972           | 0.9836                         | 0.8030         |
| NOF | 18.84                          | 0.0184                         | 0.9999         | 0.5695           | 0.7210                         | 0.7688         |
| CIP | 15.427                         | 0.0256                         | 0.9909         | 0.5541           | 0.7784                         | 0.7784         |
| ENR | 29.15                          | 0.0182                         | 0.9959         | 0.7891           | 0.5836                         | 0.9376         |

**Table S3.** Analytical results for the real samples.

| <b>Analytes</b> | <b>Spiked<br/>(<math>\mu\text{g mL}^{-1}</math>)</b> | <b>Found<br/>(<math>\mu\text{g mL}^{-1}</math>)</b> | <b>Recovery<br/>(%)</b> | <b>RSDs<br/>(%)</b> |
|-----------------|------------------------------------------------------|-----------------------------------------------------|-------------------------|---------------------|
| ENO             | 0.01                                                 | 0.01162                                             | 116.2                   | 7.12                |
|                 | 0.1                                                  | 0.1017                                              | 101.7                   | 4.02                |
|                 | 1                                                    | 1.007                                               | 100.7                   | 0.18                |
| OFL             | 0.01                                                 | 0.01156                                             | 115.6                   | 7.14                |
|                 | 0.1                                                  | 0.1023                                              | 102.3                   | 2.31                |
|                 | 1                                                    | 1.024                                               | 102.4                   | 0.43                |
| NOF             | 0.01                                                 | 0.01014                                             | 101.4                   | 8.39                |
|                 | 0.1                                                  | 0.1010                                              | 101.0                   | 4.91                |
|                 | 1                                                    | 0.992                                               | 99.2                    | 0.24                |
| CIP             | 0.01                                                 | 0.00979                                             | 97.9                    | 8.08                |
|                 | 0.1                                                  | 0.0964                                              | 96.4                    | 3.78                |
|                 | 1                                                    | 0.962                                               | 96.2                    | 0.29                |
| ENR             | 0.01                                                 | 0.00931                                             | 93.1                    | 5.50                |
|                 | 0.1                                                  | 0.1029                                              | 102.9                   | 4.13                |
|                 | 1                                                    | 1.075                                               | 107.5                   | 0.22                |



**Table S4.** Matrix effects of the developed method in water samples.

| <b>Analytes</b> | <b>ME (%)</b> | <b>RSDs(%)</b> |
|-----------------|---------------|----------------|
| ENO             | <b>19.4</b>   | <b>1.98</b>    |
| OFL             | <b>18.7</b>   | <b>1.01</b>    |
| NOF             | <b>15.2</b>   | <b>1.24</b>    |
| CIP             | <b>20.1</b>   | <b>1.74</b>    |
| ENR             | <b>12.3</b>   | <b>0.80</b>    |
